# Supplementary material
Source: PubMed Central journal article supplement (PMC7196321)
Supplement: NIHMS1581648-supplement-Supplementary_material.pdf [file NIHMS1581648-supplement-Supplementary_material.pdf]

## SUPPLEMENTARY MATERIAL

**Lifetime fitness in wild female baboons: individual heterogeneity in quality drives relationships among life history traits**, By Emily M. McLean, Elizabeth A. Archie, Susan C. Alberts

### 1 **Supplementary Methods**

2 *Selection on reproductive lifespan and birth rate.* We calculated selection differentials and selection  
3 gradients for the phenotypes considered in our quality indices (age at first reproduction, proportion  
4 offspring surviving, surviving interbirth interval and reproductive lifespan). We report selection  
5 gradients and differentials that reflect the phenotypic relationships between traits and fitness. In this  
6 approach, we are unable to estimate how traits will respond to selection (to do so would require  
7 measuring the genetic correlation between a given trait and fitness); instead, the analysis produces  
8 estimates of how traits and correlations between traits influence phenotypic natural selection  
9 (described in Lande and Arnold 1983; see Langeloh et al. 2016; Kooyers et al. 2017; Tanner et al. 2017  
10 for recent applications).

11         Selection differentials measure total predicted change in a trait resulting from selection on that  
12 trait, but do not distinguish between changes that result from *direct* selection on that trait and changes  
13 that result from *correlations* between that trait and other traits (*indirect* selection). Selection  
14 differentials were calculated from univariate regressions between the trait in question and individual  
15 fitness (LRS or  $\lambda_{ind}$ ). Selection gradients, in contrast, measure the association between a given trait and  
16 fitness that is independent of the other correlated traits included in the model. Selection gradients are  
17 represented by partial regression coefficients from a multiple regression between fitness and multiple  
18 correlated traits (Lande and Arnold 1983; see Tanner et al. 2017 for an example of this approach).

19         We calculated linear selection differentials and gradients. Linear selection differentials and  
20 gradients can be interpreted as changes that will alter the mean of the trait distribution (evidence of  
21 directional selection). For all the regression models in the selection analyses, we standardized the  
22 predictor variable(s) (zero mean, unit variance). We also standardized our fitness measures relative to  
23 the population mean.

24 *Determining the relationship between quality and the multivariate selection gradient*

## SUPPLEMENTARY MATERIAL

### **Lifetime fitness in wild female baboons: individual heterogeneity in quality drives relationships among life history traits**, By Emily M. McLean, Elizabeth A. Archie, Susan C. Alberts

25           In order to determine if the heterogeneity we observed in our multivariate index of quality was  
26 a salient feature with respect to selective pressures acting on our population, we compared the axes of  
27 variation in our quality indices to the vector,  $\beta$ , representing the partial regression coefficients of our  
28 traits of interest on LRS (table S6).  $\beta$  is the vector of selection and is integral to quantitative genetic  
29 theory (Lande Arnold 1983, Wilson Nussey 2009). To measure how well our quality indices  
30 corresponded to the vector of selection, we calculated  $\Theta$ , the angle between the vector represented by  
31 variation in quality and  $\beta$ , the vector of selection, in multivariate space.

32           Because we were concerned that the close association between reproductive lifespan and  
33 lifetime reproductive success could be solely responsible for the association between our quality index  
34 and fitness, we also constructed an alternative quality index based only on AFLB, OS and IBI<sub>s</sub>. We tested  
35 the relationship between our alternative index and fitness and found very similar results using this  
36 index, so we present only the results from our complete index.

37 *Permutation test of the tradeoff models.* We designed a permutation test to examine the possibility that  
38 covariation between our response variables (RL or OS) and our predictor variable (IBI<sub>s</sub>) may have  
39 influenced our quality metric in such a way as to bias our tradeoff models in favor of detecting tradeoffs.  
40 We conducted two separate permutation tests, one for each tradeoff model. To conduct each test, we  
41 constructed 10,000 simulated datasets. Each dataset preserved the observed pattern of covariation  
42 between the response trait (RL in tradeoff model 1 and OS in tradeoff model 2) and the predictor trait  
43 (IBI<sub>s</sub> in both tradeoff models) by retaining the observed values for these traits. For each individual in the  
44 simulated dataset, her values for the other life history traits (AFLB and OS for tradeoff model 1, AFLB  
45 and RL for tradeoff model 2) were drawn at random from our observed values. We expected this  
46 procedure to retain evidence of tradeoffs only if the tradeoff was an inevitable artifact of the observed  
47 relationship in the principal components analysis between IBI<sub>s</sub> and RL or between IBI<sub>s</sub> and OS, which  
48 were the only relationships that were preserved in the randomizations. For each dataset, we then

**SUPPLEMENTARY MATERIAL**

**Lifetime fitness in wild female baboons: individual heterogeneity in quality drives relationships among life history traits**, By Emily M. McLean, Elizabeth A. Archie, Susan C. Alberts

49 recalculated our quality index (as PC1 of a PCA using all 4 life history variables) and reconstructed our  
50 tradeoff model. To calculate p-values for our tradeoff models, we compared our observed tradeoff (the  
51 partial regression coefficient for IBI<sub>s</sub> in each tradeoff model, using the non-randomized observed data)  
52 to the distribution of partial regression coefficients for IBI<sub>s</sub> from tradeoff models using the 10,000  
53 randomized datasets.

54

**SUPPLEMENTARY MATERIAL**

**Lifetime fitness in wild female baboons: individual heterogeneity in quality drives relationships among life history traits**, By Emily M. McLean, Elizabeth A. Archie, Susan C. Alberts

55 **Supplementary Tables**

56 **Table S1.** Outlying individuals removed from all analyses

| <b>Individual</b> | <b>Phenotypic outlier<sup>1</sup>:</b> | <b>Influential datapoint<sup>2</sup> for:</b>                                       | <b>Known or suspected pathology:</b>                                                                                                                           |
|-------------------|----------------------------------------|-------------------------------------------------------------------------------------|----------------------------------------------------------------------------------------------------------------------------------------------------------------|
| K05               | Age at first birth (late)              | Fitness ~ Reproductive Lifespan (low fitness given lifespan)                        | Congenital reproductive system pathology<br>Broken leg shortly after reaching sexual maturity, followed by cessation of reproductive cycling for nearly a year |
| J00               | Age at first birth (late)              |                                                                                     | None observed                                                                                                                                                  |
| D38               |                                        | Fitness ~ Reproductive Lifespan (low fitness given lifespan)                        | None observed                                                                                                                                                  |
| L47               |                                        | Fitness ~ Reproductive Lifespan (low fitness-given-lifespan)                        | None observed                                                                                                                                                  |
| A05               | Live interbirth interval (long)        | Reproductive Lifespan ~ IBI <sub>L</sub> (short lifespan given interbirth interval) | “Disabled”; legs weak with permanently impaired locomotion                                                                                                     |
| H82               | Live interbirth interval (long)        | Reproductive Lifespan ~ IBI <sub>L</sub> (short lifespan given interbirth interval) | None observed                                                                                                                                                  |

57 <sup>1</sup>Phenotypic outliers had a phenotype > 3 standard deviations from the mean

58 <sup>2</sup>Influential outliers had a disproportionate influence on the results of the given regression model, as

59 indicated by a Cook’s distance > 0.5.

60

61

**Lifetime fitness in wild female baboons: individual heterogeneity in quality drives relationships among life history traits**, By Emily M. McLean, Elizabeth A. Archie, Susan C. Alberts

62 **Table S2. Definition and summary statistics of all phenotypes measured.**

| Trait                                             | Definition                                                                                              | Mean ± SD in study population                                                  | Median in study population                                       |
|---------------------------------------------------|---------------------------------------------------------------------------------------------------------|--------------------------------------------------------------------------------|------------------------------------------------------------------|
| Age at first live birth (AFLB)                    | Age at which female first gives birth to a live offspring.                                              | 6.01 ± 0.60 (years)                                                            | 5.9 (years)                                                      |
| Age at death (AD)                                 | Age at observed death or permanent disappearance.                                                       | 7.91 ± 7.69 (years - complete dataset)<br>14.71 ± 5.44 (years - breeders only) | 5.41 (years – complete dataset)<br>14.31 (years – breeders only) |
| Reproductive Lifespan (RL)                        | Span between age at first live birth and age at death.                                                  | 8.74 ± 5.45 (years)                                                            | 8.27 (years)                                                     |
| Offspring Survival (OS)                           | Proportion of a female’s live born offspring that survived to 70 weeks of age.                          | 0.66 ± 0.29                                                                    | 0.75                                                             |
| Live interbirth interval (IBL <sub>L</sub> )      | The time between two successive live births.                                                            | 1.67 ± 0.29 (years)<br>613 ± 106 (days)                                        | 1.67 (years)<br>608.6 (days)                                     |
| Surviving interbirth interval (IBL <sub>S</sub> ) | The time between the birth of an infant that survived to 70 weeks of age and the next live born infant. | 1.80 ± 0.33 (years)<br>659 ± 119 (days)                                        | 1.75 (years)<br>638.5 (days)                                     |

63

64 **Table S3. Detailed results from path analysis (Figure 3 in main text).**

| Path                                              | Analysis in main text (n=87) |         | Analysis with outliers (n=93) |         | Analysis with alternate definition of reproductive lifespan (n=87) |         |
|---------------------------------------------------|------------------------------|---------|-------------------------------|---------|--------------------------------------------------------------------|---------|
|                                                   | Estimate                     | p value | Estimate                      | p value | Estimate                                                           | p value |
| Offspring survival -> Reproductive Lifespan       | 0.271                        | 0.006   | 0.263                         | 0.012   | 0.220                                                              | 0.039   |
| Offspring survival -> LRS                         | 0*                           | 0.998*  | -0.001*                       | 0.978*  | -0.01*                                                             | 0.551*  |
| Offspring survival -> Live interbirth interval    | 0.46                         | 0.006   | 0.44                          | <0.0001 | 0.31                                                               | 0.003   |
| Reproductive Lifespan -> LRS                      | 0.97                         | <0.0001 | 0.90                          | <0.0001 | 0.92                                                               | <0.0001 |
| Live interbirth interval -> LRS                   | -0.21                        | <0.0001 | -0.28                         | <0.0001 | -0.33                                                              | <0.0001 |
| Live interbirth interval -> Reproductive lifespan | -0.05*                       | 0.693*  | -0.10*                        | 0.411*  | -0.12*                                                             | 0.253*  |

**SUPPLEMENTARY MATERIAL**

**Lifetime fitness in wild female baboons: individual heterogeneity in quality drives relationships among life history traits**, By Emily M. McLean, Elizabeth A. Archie, Susan C. Alberts

65 \*Not included in best model, these results are from the full model

66

67

**Lifetime fitness in wild female baboons: individual heterogeneity in quality drives relationships among life history traits**, By Emily M. McLean, Elizabeth A. Archie, Susan C. Alberts

68 **Table S4.** Detailed results from models of offspring survival (the ‘OS model’) and live interbirth interval  
 69 (the ‘IBI<sub>L</sub> model’); Figure 3 in main text.

| Response variable                            | Predictor                             | Analysis in main text (Offspring survival: n=539 offspring, n=96 females; Live birth interval: n=443 intervals, n=87 females; Surviving birth intervals, n=337 intervals, n=82 females) |          | Analysis with outliers (Offspring survival: n=567 offspring, n=102 females; live birth interval: n=465 intervals, n=93 females) |          | Analysis with alternate definition of reproductive lifespan (Offspring survival: n=539 offspring, n=96 females; live birth interval: n=443 intervals, n=87 females) |          |
|----------------------------------------------|---------------------------------------|-----------------------------------------------------------------------------------------------------------------------------------------------------------------------------------------|----------|---------------------------------------------------------------------------------------------------------------------------------|----------|---------------------------------------------------------------------------------------------------------------------------------------------------------------------|----------|
|                                              |                                       | Estimate                                                                                                                                                                                | p value  | Estimate                                                                                                                        | p value  | Estimate                                                                                                                                                            | p value  |
| Offspring survival probability (OS)          | Mother’s age at birth                 | -0.367                                                                                                                                                                                  | 0.018    | -0.327                                                                                                                          | 0.0274   | -0.347                                                                                                                                                              | 0.0246   |
|                                              | Mother nulliparous (Y)                | -0.616                                                                                                                                                                                  | 0.056    | -0.654                                                                                                                          | 0.0381   | -0.6117                                                                                                                                                             | 0.0572   |
|                                              | Mother’s death in weaning period (Y)  | -1.42                                                                                                                                                                                   | <0.0001  | -1.52                                                                                                                           | <0.0001  | -1.478                                                                                                                                                              | <0.0001  |
|                                              | Mother’s reproductive lifespan        | 0.353                                                                                                                                                                                   | 0.017    | 0.301                                                                                                                           | 0.322    | 0.3154                                                                                                                                                              | 0.0302   |
|                                              | Mother’s ID (random)                  | Variance: 0.1248                                                                                                                                                                        | 0.381*   | Variance: 0.12614                                                                                                               | 0.373*   | Variance: 0.1387                                                                                                                                                    | 0.3338*  |
|                                              | Offspring Birth year (random)         | Variance: 0.0455                                                                                                                                                                        | 0.6347*  | Variance: 0.07808                                                                                                               | 0.4247*  | Variance: 0.04567                                                                                                                                                   | 0.6356*  |
| Live interbirth interval (IBI <sub>L</sub> ) | Mother’s age at birth                 | 1.352                                                                                                                                                                                   | 0.885    | 0.7222                                                                                                                          | 0.9398   | 1.911                                                                                                                                                               | 0.839    |
|                                              | Mother nulliparous (Y)                | -15.588                                                                                                                                                                                 | 0.397    | -32.479                                                                                                                         | 0.0849   | -15.821                                                                                                                                                             | 0.390    |
|                                              | Offspring death in weaning period (Y) | -170.71                                                                                                                                                                                 | <0.0001  | -175.849                                                                                                                        | <0.0001  | -170.354                                                                                                                                                            | <0.0001  |
|                                              | Mother’s reproductive lifespan        | -5.705                                                                                                                                                                                  | 0.590    | -20.164                                                                                                                         | 0.0865   | -7.88                                                                                                                                                               | 0.456    |
|                                              | Mother’s ID (random)                  | Variance: 4132                                                                                                                                                                          | <0.0001* | Variance: 6859                                                                                                                  | <0.0001* | Variance: 4105                                                                                                                                                      | <0.0001* |
|                                              | Offspring Birth year (random)         | Variance: 1733                                                                                                                                                                          | 0.0002*  | Variance: 1893                                                                                                                  | 0.0001*  | Variance: 1737                                                                                                                                                      | 0.0002*  |

70 \*significance values determined by likelihood ratio test between models with and without the indicated  
 71 random effect

**Lifetime fitness in wild female baboons: individual heterogeneity in quality drives relationships among life history traits**, By Emily M. McLean, Elizabeth A. Archie, Susan C. Alberts

73

74 **Table S5.** Results from our four tradeoff models of the relationships between surviving interbirth  
 75 interval (IBI<sub>s</sub>) and RL, and between IBI<sub>s</sub> and OS, controlling for individual quality. Here we present the  
 76 results if we include outliers, and the results if we use our alternative definition of reproductive lifespan  
 77 (see main text and Table 2 for results excluding outliers)

| Response variable                 | Model description                               | Predictor                     | Analysis with outliers (n=86) |         | Analysis with alternate definition of reproductive lifespan (n=82) |          |
|-----------------------------------|-------------------------------------------------|-------------------------------|-------------------------------|---------|--------------------------------------------------------------------|----------|
|                                   |                                                 |                               | Effect Size (se)              | p value | Effect size (se)                                                   | p value  |
| 1. Reproductive Lifespan          | RL~IBI <sub>s</sub> not controlling for quality | Surviving interbirth interval | 0.005 (0.004)                 | 0.30    | 0.001 (0.004)                                                      | 0.757    |
| 2. Reproductive Lifespan          | RL~IBI <sub>s</sub> controlling for quality     | Surviving interbirth interval | -0.007 (0.009)                | 0.45    | 0.02 (0.007)                                                       | 0.003    |
|                                   |                                                 | Quality                       | 1.34 (0.94)                   | 0.16    | 2.35 (0.67)                                                        | 0.0006   |
| 3. Proportion offspring surviving | OS~IBI <sub>s</sub> not controlling for quality | Surviving interbirth interval | 0.0001 (0.0002)               | 0.57    | 4.4e-05 (1.89e-04)                                                 | 0.82     |
| 4. Proportion offspring surviving | OS~IBI <sub>s</sub> controlling for quality     | Surviving interbirth interval | 0.0006 (0.0004)               | 0.093   | 0.001 (0.0003)                                                     | 0.0003   |
|                                   |                                                 | Quality                       | -0.06 (0.04)                  | 0.11    | 0.12 (0.027)                                                       | 1.96e-05 |

78 \*Higher values of surviving interbirth interval represent longer birth intervals and slower birth rates.  
 79 Therefore, a positive regression coefficient is indicative of a tradeoff (slower birth rates associated with  
 80 longer lives)

81

82

83

84

85



**SUPPLEMENTARY MATERIAL**

**Lifetime fitness in wild female baboons: individual heterogeneity in quality drives relationships among life history traits**, By Emily M. McLean, Elizabeth A. Archie, Susan C. Alberts

86 **Table S6.** Selection differentials (univariate regression coefficients) and selection gradients (partial  
87 regression coefficients) for the four components of the quality metrics: age at first live birth, offspring  
88 survival, surviving birth interval and reproductive lifespan, with significant relationships in bold.

89

| Fitness Measure | Trait*                                          | Linear Selection Differential – Univariate Selection (p) | Linear Selection Gradient ** – Multivariate Selection (p) |
|-----------------|-------------------------------------------------|----------------------------------------------------------|-----------------------------------------------------------|
| LRS             | Age at first live birth, AFLB                   | <b>-0.11 (0.02)</b>                                      | <b>-0.07 (0.002)</b>                                      |
| LRS             | Offspring surviving, OS                         | -0.02 (0.63)                                             | <b>-0.07 (0.001)</b>                                      |
| LRS             | Surviving interbirth interval, IBI <sub>s</sub> | <b>-0.12 (0.01)</b>                                      | <b>-0.08 (0.0009)</b>                                     |
| LRS             | Reproductive Lifespan, RL                       | <b>0.42 (&lt;0.0001)</b>                                 | <b>0.42 (&lt;0.0001)</b>                                  |
| $\lambda_{IND}$ | Age at first live birth, AFLB                   | <b>-0.02 (0.0003)</b>                                    | <b>-0.01 (&lt;0.0001)</b>                                 |
| $\lambda_{IND}$ | Offspring survival, OS                          | <b>-0.01 (0.046)</b>                                     | <b>-0.01 (&lt;0.0001)</b>                                 |
| $\lambda_{IND}$ | Surviving interbirth interval, IBI <sub>s</sub> | <b>-0.02 (&lt;0.0001)</b>                                | <b>-0.01 (0.002)</b>                                      |
| $\lambda_{IND}$ | Reproductive Lifespan, RL                       | <b>0.03 (&lt;0.0001)</b>                                 | <b>0.03 (&lt;0.0001)</b>                                  |

90

91 \*See table S1 for definitions

92 \*\* The selection gradients represent the multivariate vectors of selection that were then used to  
93 determine  $\Theta$ , the angle between the vector of multivariate selection and PC1 shown in table S7.

94

95

96 **Table S7.** Relationships between PC1 and PC2 of our multivariate quality index and the vectors of  
97 multivariate selection for LRS and  $\lambda_{IND}$ .

| Measures contributing to the quality Index | Principle Component | $\Theta_{LRS}$ | $\Theta_{\lambda_{IND}}$ |
|--------------------------------------------|---------------------|----------------|--------------------------|
| AFLB, OS, IBI <sub>s</sub> , RL*           | PC1                 | 75°            | 70°                      |
|                                            | PC2                 | 59°            | 70°                      |

100

101 \*See table S1 for definitions of acronyms

102

103

104

**SUPPLEMENTARY MATERIAL**

**Lifetime fitness in wild female baboons: individual heterogeneity in quality drives relationships among life history traits**, By Emily M. McLean, Elizabeth A. Archie, Susan C. Alberts

105 **Table S8.** Proportion of variance explained by each principal component

|                        | PC1    | PC2    | PC3    | PC4    |
|------------------------|--------|--------|--------|--------|
| Proportion of variance | 0.3756 | 0.2825 | 0.2203 | 0.1216 |
| Cumulative Proportion  | 0.3756 | 0.6581 | 0.8783 | 1.00   |

106

Lifetime fitness in wild female baboons: individual heterogeneity in quality drives relationships among life history traits, By Emily M. McLean, Elizabeth A. Archie, Susan C. Alberts

107 **Supplementary Figures**

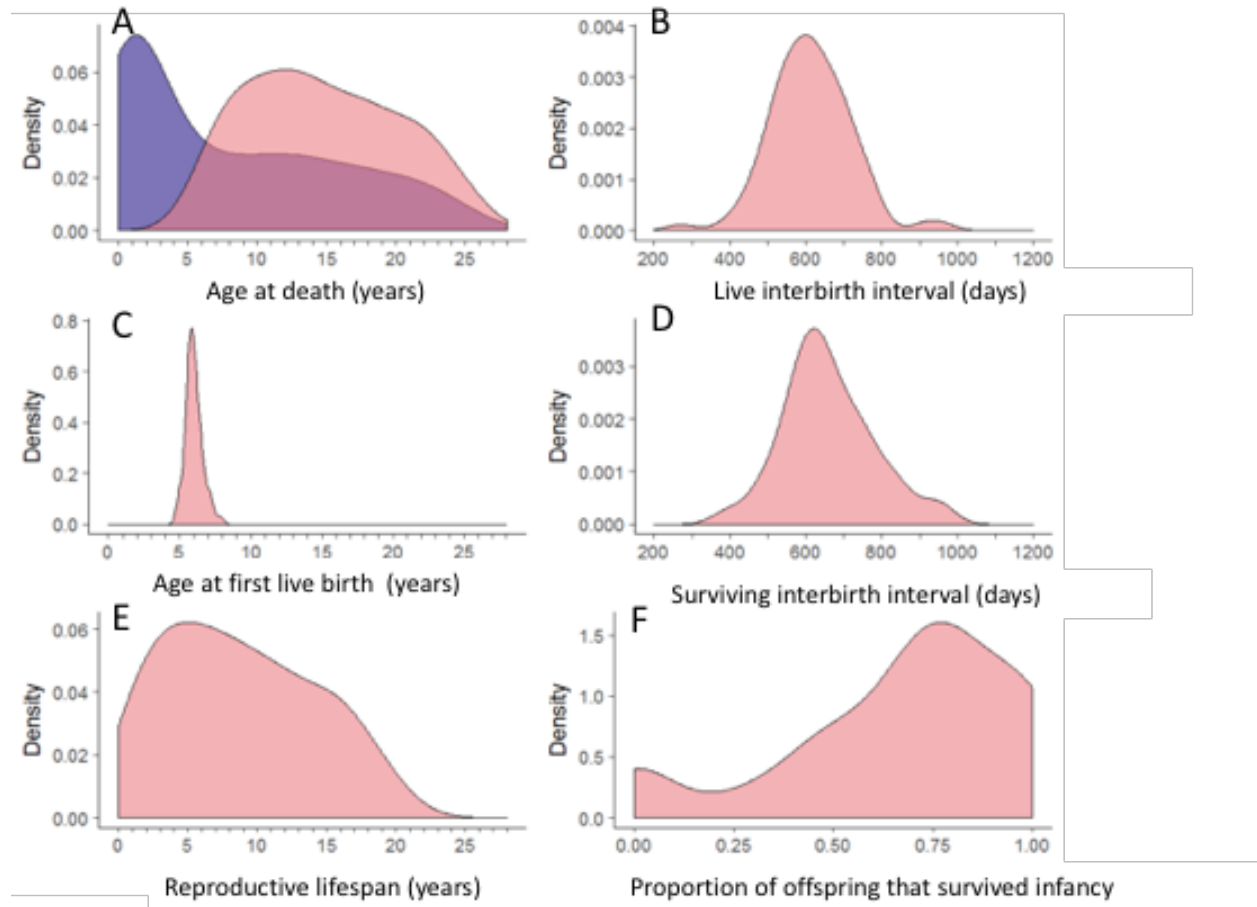

108  
 109 **Figure S1.** Kernel density plots showing the distributions of life history variables for breeders (pink) and  
 110 entire population (purple). Only age at death could be measured for females who failed to reproduce.

111

Lifetime fitness in wild female baboons: individual heterogeneity in quality drives relationships among life history traits, By Emily M. McLean, Elizabeth A. Archie, Susan C. Alberts

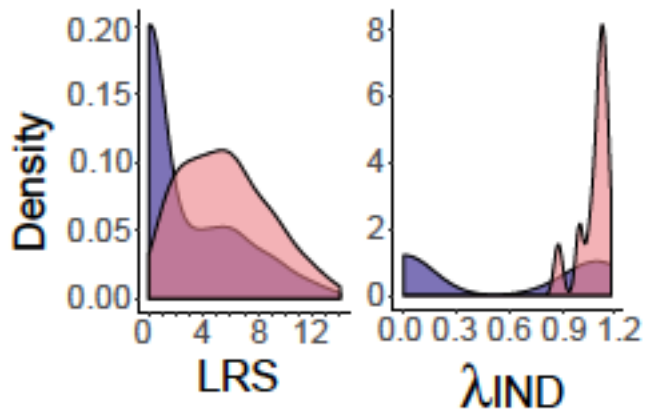

120 **Figure S2.** Kernel density plots showing the distribution of (A) values of LRS and (B) values of  $\lambda_{IND}$ , for the  
121 entire sample (dark purple) and for breeders only (light orange).

122  
123  
124  
125

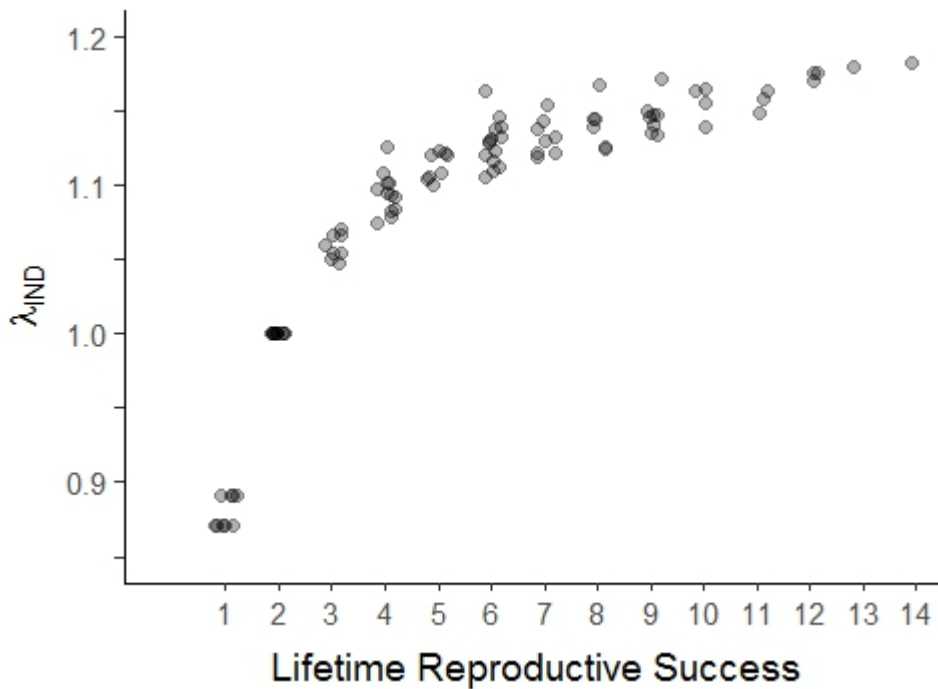

126  
127 **Figure S3.** Curvilinear relationship between LRS and  $\lambda_{IND}$ .

128

**SUPPLEMENTARY MATERIAL**

**Lifetime fitness in wild female baboons: individual heterogeneity in quality drives relationships among life history traits**, By Emily M. McLean, Elizabeth A. Archie, Susan C. Alberts

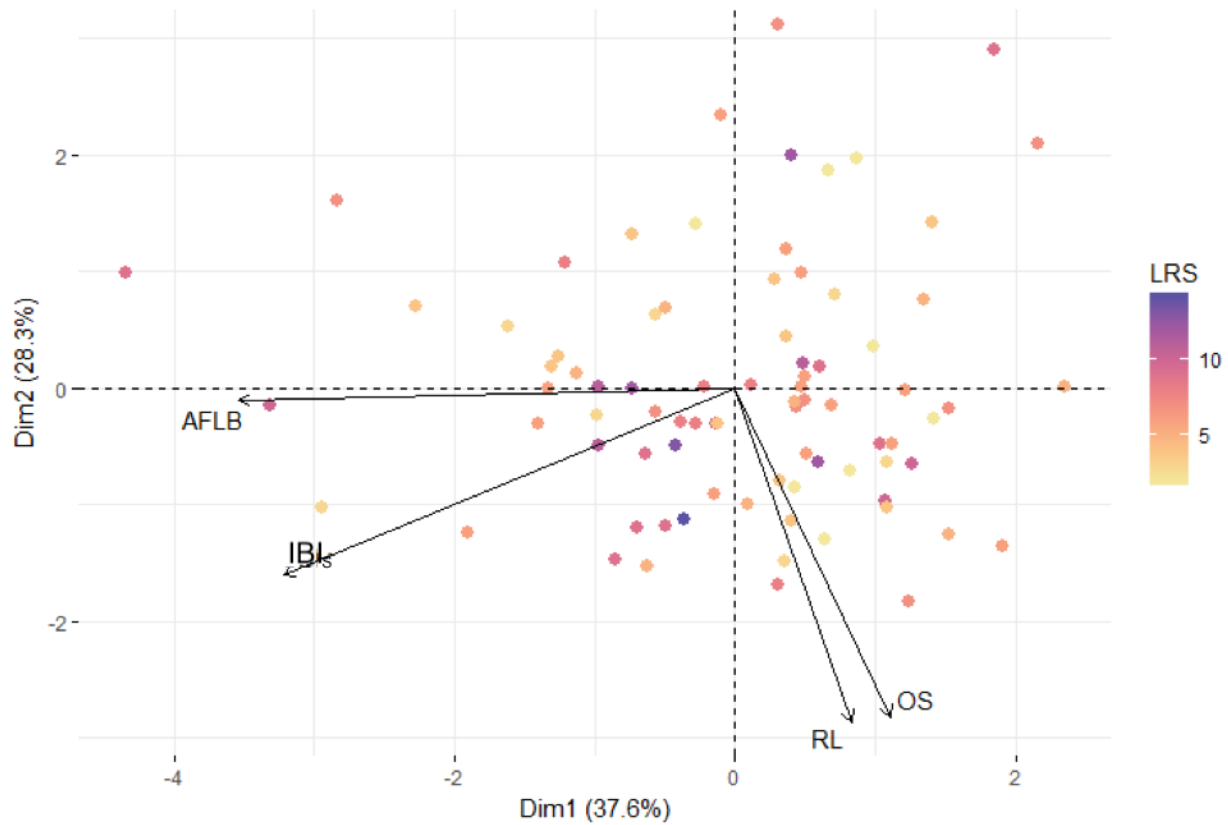

129

130 **Figure S4.** Visualization of principal components analysis. Points represent individual baboons and are  
131 colored to reflect their lifetime reproductive success. Arrows represent the variables included in the  
132 analysis. The direction and magnitude of the arrows reflects how well the variables correspond to PC1  
133 (x-axis) and PC2 (y-axis). Dim1 (x-axis) is our quality metric, individuals on the left side of the plot have  
134 early ages at first live birth (AFLB) and short birth intervals (IBI<sub>s</sub>).

135

136

**SUPPLEMENTARY MATERIAL**

**Lifetime fitness in wild female baboons: individual heterogeneity in quality drives relationships among life history traits**, By Emily M. McLean, Elizabeth A. Archie, Susan C. Alberts

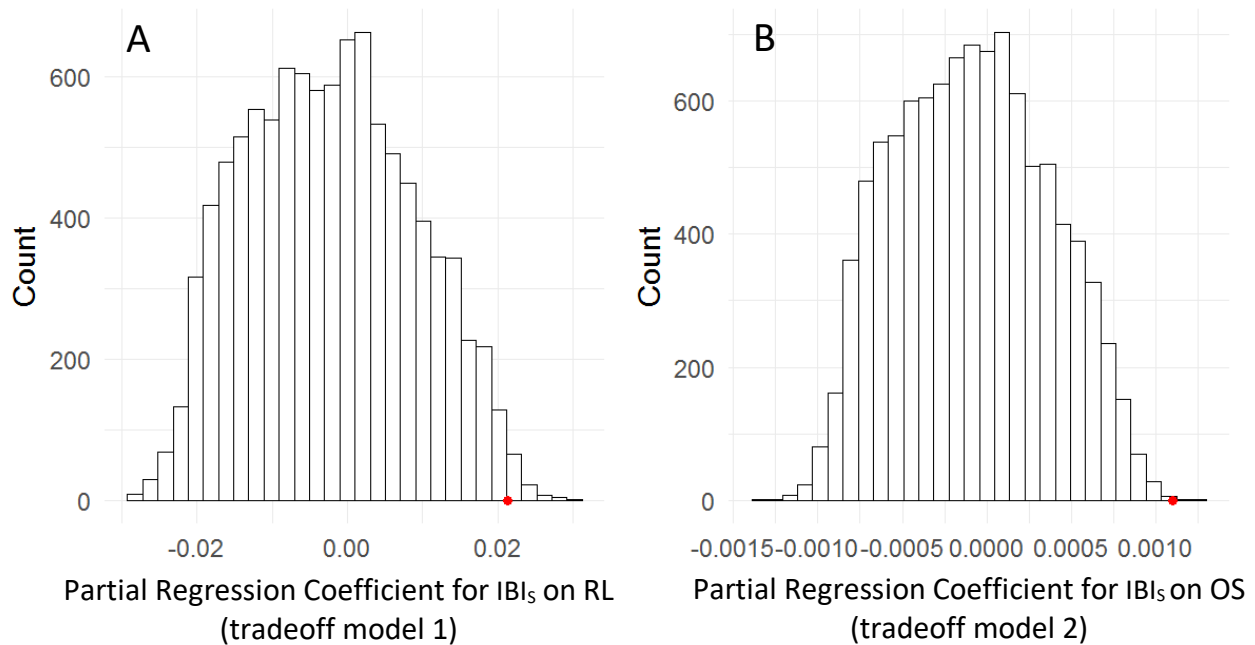

137

138

139

140

141

142

143

144

145

146

147

148

**Figure S5. Distribution of tradeoff values from permutation tests.** Panel A shows the distribution of partial regression coefficients for IBI<sub>5</sub> from our permutation test for tradeoff model 1 ( $RL \sim IBI_5 + \text{Quality}$ ). Panel B shows the distribution of partial regression coefficients for IBI<sub>5</sub> from our permutation test for tradeoff model 2 ( $OS \sim IBI_5 + \text{Quality}$ ). The values of partial regression coefficients for IBI<sub>5</sub> from our actual, non-randomized dataset are indicated by a red dot along the x-axis in each panel. Our observed tradeoff in model 1 (A) was greater than 99.05% of the tradeoff values reported from randomized datasets ( $p=0.0095$ ). Our observed tradeoff in model 2 (B) was greater than 99.95% of the tradeoff values reported from randomized datasets ( $p=0.0005$ ). Note: positive values of the partial regression coefficient for IBI<sub>5</sub> indicate a tradeoff, because high values of IBI<sub>5</sub> indicate long intervals between births, i.e., slow birth rates.
